# Supplementary material for: Genomic Regions Associated With Skeletal Type Traits in Beef and Dairy Cattle Are Common to Regions Associated With Carcass Traits, Feed Intake and Calving Difficulty
Source: PubMed Central journal article supplement (PMC7010604; doi:10.3389/fgene.2020.00020), 2020-02-04
Supplement: Data_Sheet_6.pdf [file Data_Sheet_6.pdf]

a)

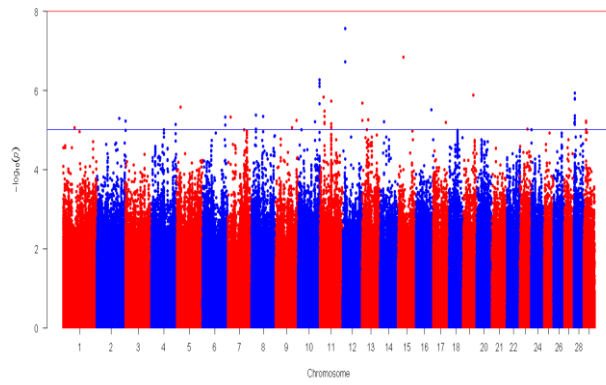

b)

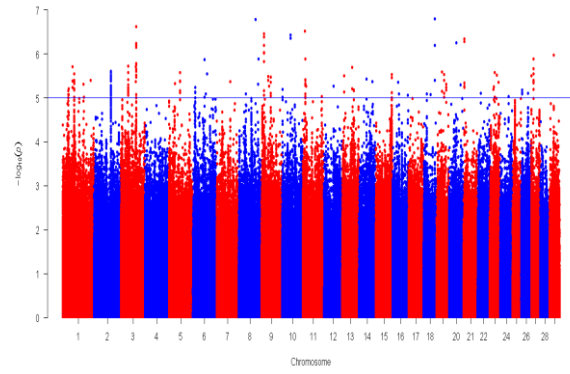

c)

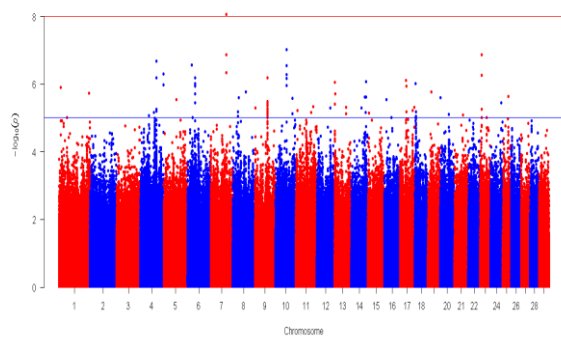

d)

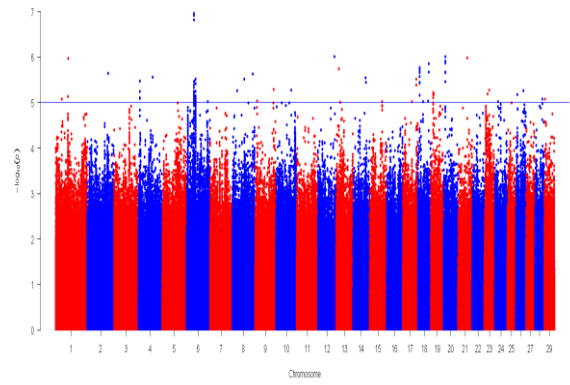

e)

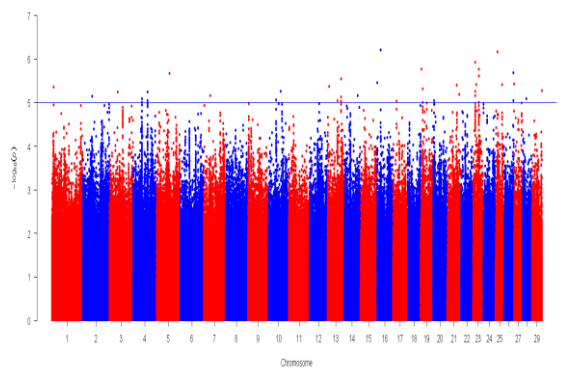

f)

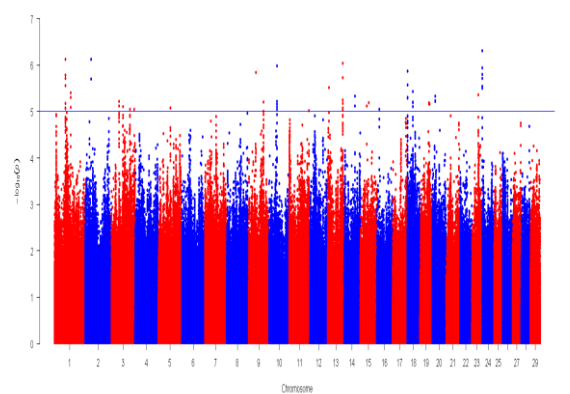

Figure S6: Manhattan plots for chest width in a) Angus, b) Charolais, c) Hereford, d) Limousin, e) Simmental and f) Holstein-Friesian.
