# Supplementary material for: Genomic Regions Associated With Skeletal Type Traits in Beef and Dairy Cattle Are Common to Regions Associated With Carcass Traits, Feed Intake and Calving Difficulty
Source: PubMed Central journal article supplement (PMC7010604; doi:10.3389/fgene.2020.00020), 2020-02-04
Supplement: Data_Sheet_7.pdf [file Data_Sheet_7.pdf]

a)

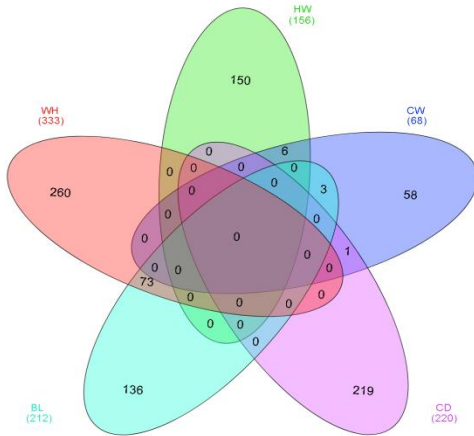

b)

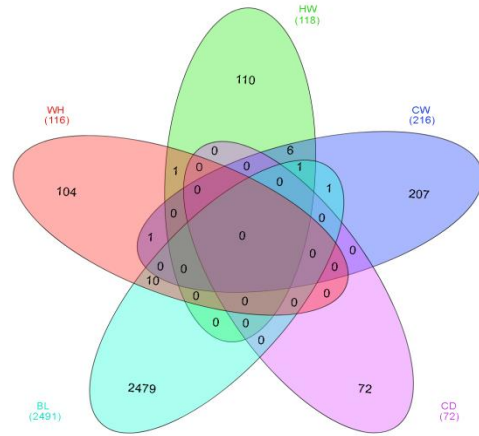

c)

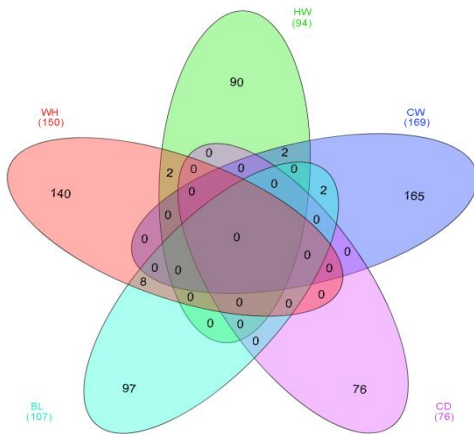

d)

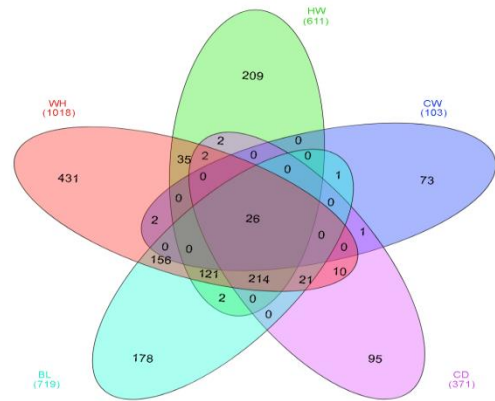

e)

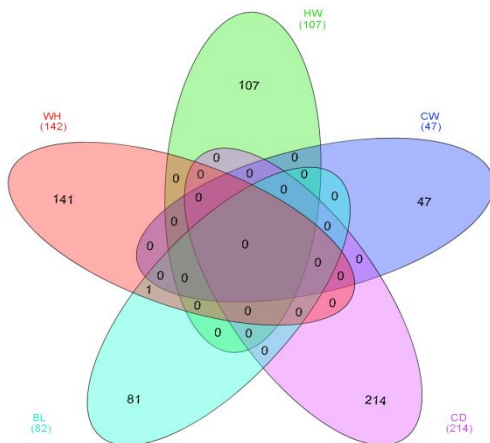

f)

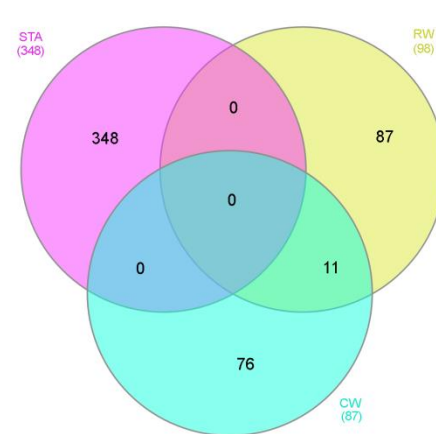

1 Figure S7: Overlapping 1kb regions that contain at least one suggestive or significant SNP for  
 2 the 5 muscular traits in a) Angus, b) Charolais, c) Hereford, d) Limousin, e) Simmental, and  
 3 three muscular traits in the Holstein-Friesian (f). The muscular traits were wither height  
 4 (WH), hip width (HW), chest width (CW), chest depth (CD), and back length (BL)
