# Supplementary material for: Genomic Regions Associated With Skeletal Type Traits in Beef and Dairy Cattle Are Common to Regions Associated With Carcass Traits, Feed Intake and Calving Difficulty
Source: PubMed Central journal article supplement (PMC7010604; doi:10.3389/fgene.2020.00020), 2020-02-04
Supplement: Table_1.pdf [file Table_1.pdf]

Table S1: The number of records, the mean, and the standard deviation of each linear type trait in each beef breed.

| Trait         | Scale<br>1-10     | Angus |      |      | Charolais |      |      | Hereford |      |      | Limousin |      |      | Simmental |      |      |
|---------------|-------------------|-------|------|------|-----------|------|------|----------|------|------|----------|------|------|-----------|------|------|
|               |                   | n     | Mean | SD   | n         | Mean | SD   | n        | Mean | SD   | n        | Mean | SD   | n         | Mean | SD   |
| Wither height | small - tall      | 1444  | 5.42 | 1.01 | 6432      | 5.98 | 1.13 | 1129     | 5.47 | 1.02 | 8745     | 5.74 | 1.09 | 1698      | 6.20 | 1.04 |
| Chest width   | narrow -<br>wide  | 1434  | 5.63 | 0.96 | 6252      | 6.18 | 0.97 | 1128     | 5.64 | 0.88 | 8537     | 5.80 | 0.97 | 1619      | 6.06 | 0.95 |
| Chest depth   | shallow -<br>deep | 1433  | 6.35 | 0.90 | 6252      | 6.77 | 0.93 | 1128     | 6.36 | 0.88 | 8537     | 6.43 | 0.91 | 1619      | 6.84 | 0.87 |
| Back length   | short - long      | 1444  | 6.27 | 1.03 | 6432      | 6.75 | 1.07 | 1129     | 6.30 | 1.04 | 8745     | 6.59 | 1.08 | 1698      | 7.04 | 0.96 |
| Hip width     | narrow -<br>wide  | 1444  | 5.46 | 0.95 | 6432      | 5.72 | 0.95 | 1129     | 5.66 | 0.89 | 8745     | 5.62 | 1.06 | 1698      | 5.96 | 0.95 |
