# Supplementary material for: Genomic Regions Associated With Skeletal Type Traits in Beef and Dairy Cattle Are Common to Regions Associated With Carcass Traits, Feed Intake and Calving Difficulty
Source: PubMed Central journal article supplement (PMC7010604; doi:10.3389/fgene.2020.00020), 2020-02-04
Supplement: Table_2.pdf [file Table_2.pdf]

Table S2: The number of records, the mean, and the standard deviation of each linear type trait in Holstein Friesian.

| Trait       | Scale 1-9     | Holstein Friesian |      |      |
|-------------|---------------|-------------------|------|------|
|             |               | n                 | Mean | SD   |
| Stature     | small- tall   | 4494              | 5.96 | 1.47 |
| Chest width | narrow - wide | 4494              | 5.15 | 1.48 |
| Rump width  | narrow - wide | 4494              | 5.49 | 1.42 |
