# Supplementary material for: Genomic Regions Associated With Skeletal Type Traits in Beef and Dairy Cattle Are Common to Regions Associated With Carcass Traits, Feed Intake and Calving Difficulty
Source: PubMed Central journal article supplement (PMC7010604; doi:10.3389/fgene.2020.00020), 2020-02-04
Supplement: Table_3.pdf [file Table_3.pdf]

1 Table S3: The location of the top 5 most significant QTLs associated with each of the skeletal traits in the meta-analysis.

| Trait         | Chr | Start     | End       | No of suggestive and significant SNPs | Most significant SNP   | P-Value                | Candidate genes within this QTL                                                        |
|---------------|-----|-----------|-----------|---------------------------------------|------------------------|------------------------|----------------------------------------------------------------------------------------|
| Wither Height | 5   | 105280734 | 106302598 | 28                                    | 105783088 <sup>a</sup> | 4.00x10 <sup>-7</sup>  | KCNA1, NDUFA9, FGF6, FGF23, TIGAR                                                      |
|               | 6   | 32458499  | 35344463  | 590                                   | 33574963 <sup>a</sup>  | 1.60x10 <sup>-8</sup>  | CCSER1                                                                                 |
|               | 6   | 36934944  | 40367479  | 233                                   | 38692833 <sup>a</sup>  | 1.39x10 <sup>-10</sup> | PPM1K, ABCG2, PKD2, SPP1, MEPE, LAP3, NCAPG, LCORL                                     |
|               | 15  | 16857667  | 17866073  | 3                                     | 17357667 <sup>a</sup>  | 5.08x10 <sup>-7</sup>  | ALKBH8, RAB39A                                                                         |
|               | 22  | 1921471   | 3018467   | 32                                    | 2517667 <sup>a</sup>   | 4.87x10 <sup>-7</sup>  | CMC1                                                                                   |
| Chest Width   | 1   | 78722748  | 79819964  | 9                                     | 79281613 <sup>b</sup>  | 1.78x10 <sup>-7</sup>  | TPRG1, LPP                                                                             |
|               | 2   | 84546041  | 85547642  | 17                                    | 85047257 <sup>a</sup>  | 6.63x10 <sup>-7</sup>  | SLC39A10, DNAH7, STK17B, HECW2                                                         |
|               | 8   | 111704513 | 112713771 | 5                                     | 112207970 <sup>b</sup> | 1.49x10 <sup>-6</sup>  | CDK5RAP2, FBXW2, TRAF1                                                                 |
|               | 16  | 34222491  | 35399155  | 7                                     | 34722616 <sup>b</sup>  | 1.01x10 <sup>-6</sup>  | AKT3, SDCCAG8, CEP170                                                                  |
|               | 19  | 60882962  | 61882988  | 3                                     | 61382974 <sup>a</sup>  | 3.64x10 <sup>-7</sup>  | KCNJ2, KCNJ16, MAP2K6, ABCA5                                                           |
| Chest Depth   | 1   | 116367840 | 117409053 | 15                                    | 116884742 <sup>c</sup> | 7.63x10 <sup>-7</sup>  | MBNL1, AADAC                                                                           |
|               | 5   | 3711874   | 4919423   | 75                                    | 4314400 <sup>a</sup>   | 1.44x10 <sup>-7</sup>  | CAPS2                                                                                  |
|               | 5   | 80773564  | 81859095  | 13                                    | 81273564 <sup>a</sup>  | 1.29x10 <sup>-9</sup>  | CCDC91                                                                                 |
|               | 11  | 77828096  | 78855720  | 2                                     | 78355720 <sup>a</sup>  | 5.74x10 <sup>-7</sup>  | GDF7, RHOB, SDC1                                                                       |
|               | 13  | 67722025  | 68774518  | 3                                     | 68222752 <sup>b</sup>  | 8.81x10 <sup>-9</sup>  | KIAA1755, ADIG, DHX35                                                                  |
| Back Length   | 2   | 1         | 9238659   | 969                                   | 5535691 <sup>a</sup>   | 1.69x10 <sup>-19</sup> | ASNSD1, ARHGEF4, MYO7B, NABI, MFS6, MSTN, PMS1, ORMDL1, COL3A1, COL5A2, ANKAR, SLC40A1 |
|               | 6   | 32966339  | 34249299  | 192                                   | 33471768 <sup>d</sup>  | 1.66x10 <sup>-8</sup>  |                                                                                        |
|               | 6   | 36399608  | 40835172  | 107                                   | 38672441 <sup>c</sup>  | 4.04x10 <sup>-10</sup> | PPM1K, ABCG2, PKD2, SPP1, MEPE, LAP3, NCAPG, LCORL                                     |
|               | 12  | 41360854  | 42774040  | 8                                     | 41860854 <sup>a</sup>  | 3.67x10 <sup>-7</sup>  |                                                                                        |
|               | 13  | 75166652  | 76244228  | 3                                     | 75166652 <sup>b</sup>  | 4.86x10 <sup>-7</sup>  | DNTTI1, TNNC2, PLTP, NCOA5, CDH22, OCSTAMP                                             |
| Hip Width     | 6   | 37042897  | 40544352  | 36                                    | 38648218 <sup>b</sup>  | 2.58x10 <sup>-7</sup>  | PPM1K, ABCG2, PKD2, SPP1, MEPE, LAP3, NCAPG, LCORL                                     |
|               | 11  | 74549091  | 75686706  | 7                                     | 75078608 <sup>b</sup>  | 3.54x10 <sup>-7</sup>  | NCOA1, ITS1, FKBP1B, ATAD2B, KLHL29                                                    |
|               | 15  | 7741333   | 8881109   | 3                                     | 8381102 <sup>a</sup>   | 2.76x10 <sup>-7</sup>  | ARHGAP42                                                                               |
|               | 18  | 9307588   | 10781382  | 4                                     | 10281382 <sup>a</sup>  | 3.42x10 <sup>-7</sup>  | CDH13, HSBP1, MBTPS1, DNAAF1, TAF1C, ATP2C2, COTL1                                     |
|               | 23  | 6956952   | 7970369   | 3                                     | 7456952 <sup>a</sup>   | 5.27x10 <sup>-7</sup>  | GCLC, DSB, TAP2, PSMB8, TAP1, PSMB9, COL11A2, HSD17B8, RING1, RPS18, DAXX, BAK1        |

2 Superscript denotes SNP classification: <sup>a</sup>intergenic, <sup>b</sup>intron, <sup>c</sup>upstream gene variant, <sup>d</sup>downstream gene variant
